# Supplementary material for: Possible intermediates of Cu(phen)-catalyzed C–O cross-coupling of phenol with an aryl bromide by in situ ESI-MS and EPR studies
Source: Royal Society of Chemistry journal article supplement (doi:10.1039/c4dt00582a), 2014-01-01

## Supplementary Information

### Possible Intermediates of Cu(Phen)-catalyzed C-O cross coupling of phenol with aryl bromide by *in situ* ESI-MS and EPR studies

Hong-Jie Chen, I-Jui Hsu, Mei-Chun Tseng, and Shin-Guang Shyu\*

*Institute of Chemistry, Academia Sinica, 128 Academia Road Sec. 2, Nankang Taipei 115 Taiwan,  
R.O.C. and Institute of Chemistry, National Central University, 300, Zhongda Rd., Zhongli City,  
Taoyuan County 32001, Taiwan, R.O.C.*

E-mail: sgshyu@chem.sinica.edu.tw; Fax: +886-2-2783-1237; Tel: +886-2-2789-8593

#### CONTENT

|                                                                                  |        |
|----------------------------------------------------------------------------------|--------|
| 1. GC data for Copper-Catalyzed C-O Cross-Coupling Reaction.....                 | S2-S7  |
| 2. <i>In situ</i> ESI-MS Spectra and Isotope Distributions of Intermediates..... | S8-S17 |
| 3. EPR spectra for Copper-Catalyzed C-O Cross-Coupling Reaction.....             | S18    |

## GC data for Copper-Catalyzed C-O Cross-Coupling Reaction

1. Copper-catalyzed C-O coupling reaction of 2,4-dimethyl phenol with 4-bromotoluene by CuI/phen/K<sub>2</sub>CO<sub>3</sub>.

For 8 h

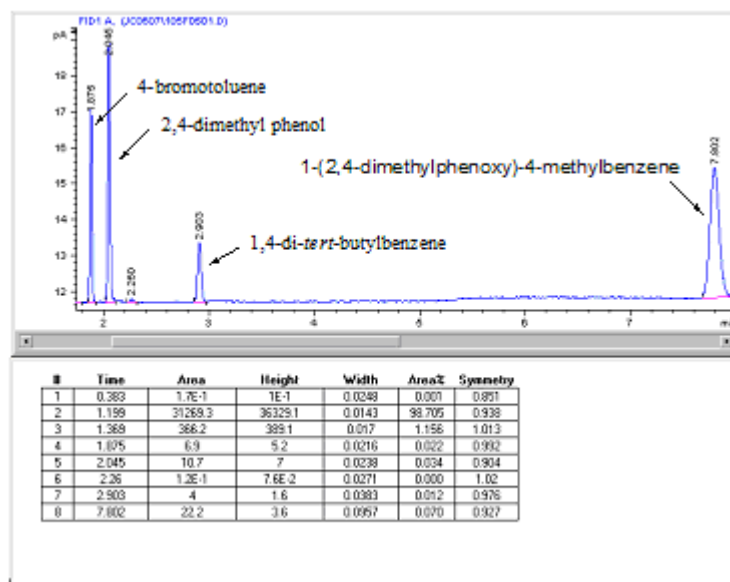

2. Copper-catalyzed C-O coupling reaction of 2,4-dimethyl phenol with 4-bromotoluene by CuI/K<sub>2</sub>CO<sub>3</sub>.

For 8 h

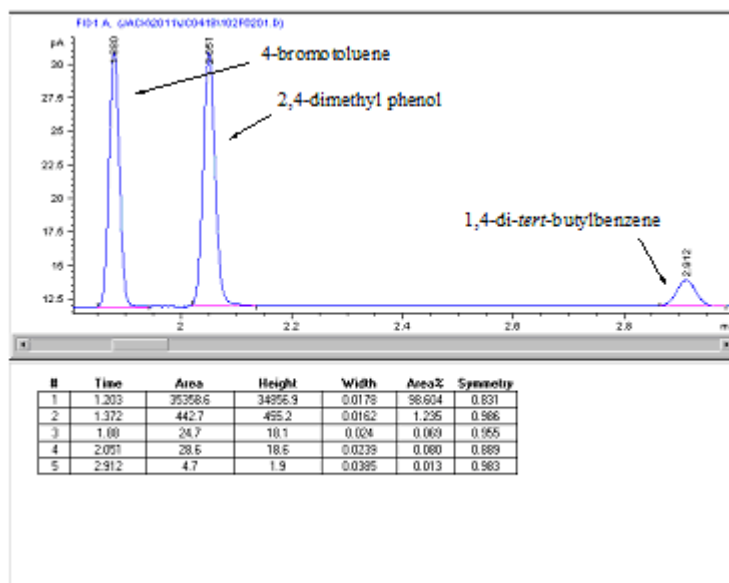

For 48 h

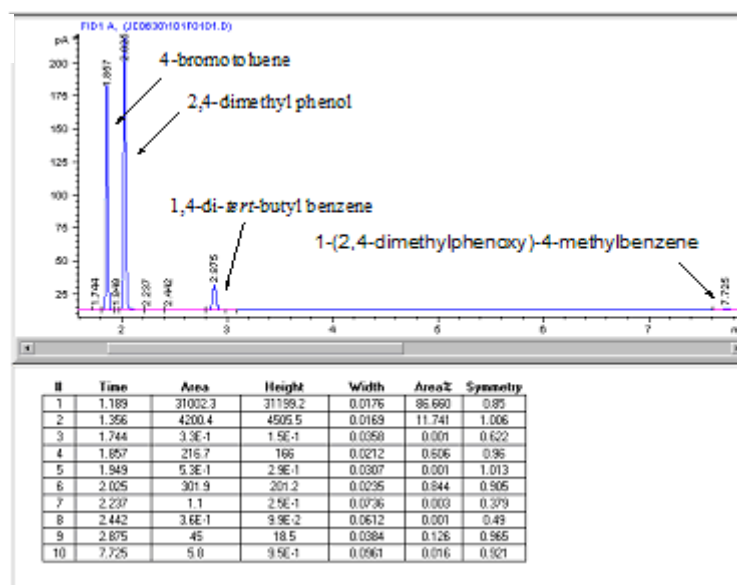

3. Copper-catalyzed C-O coupling reaction of 2,4-dimethyl phenol with 4-bromotoluene by  
 CuI/phen/K<sub>2</sub>CO<sub>3</sub>/Cumene.

Cumene 20 mol%

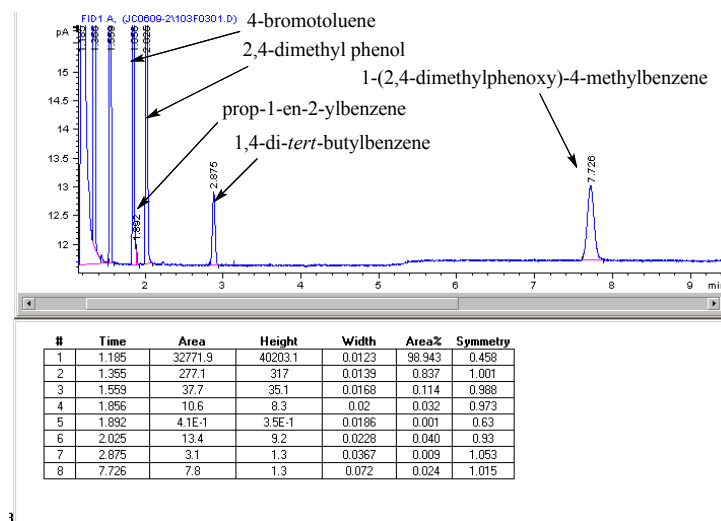

Cumene 50 mol%

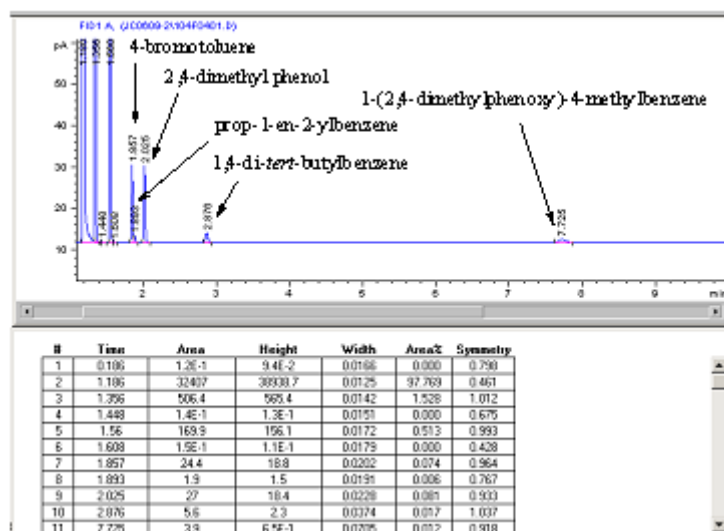

GC-MS data of prop-1-en-2-ylbenzene

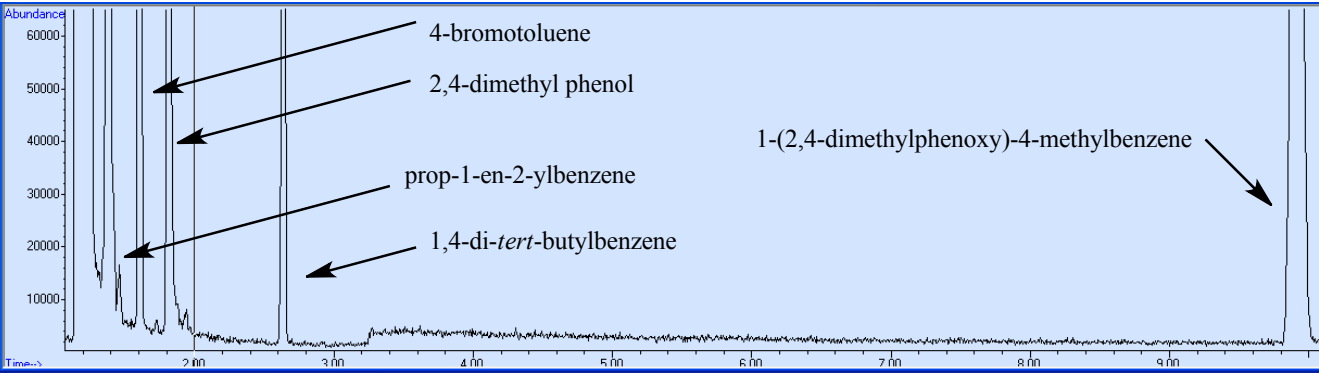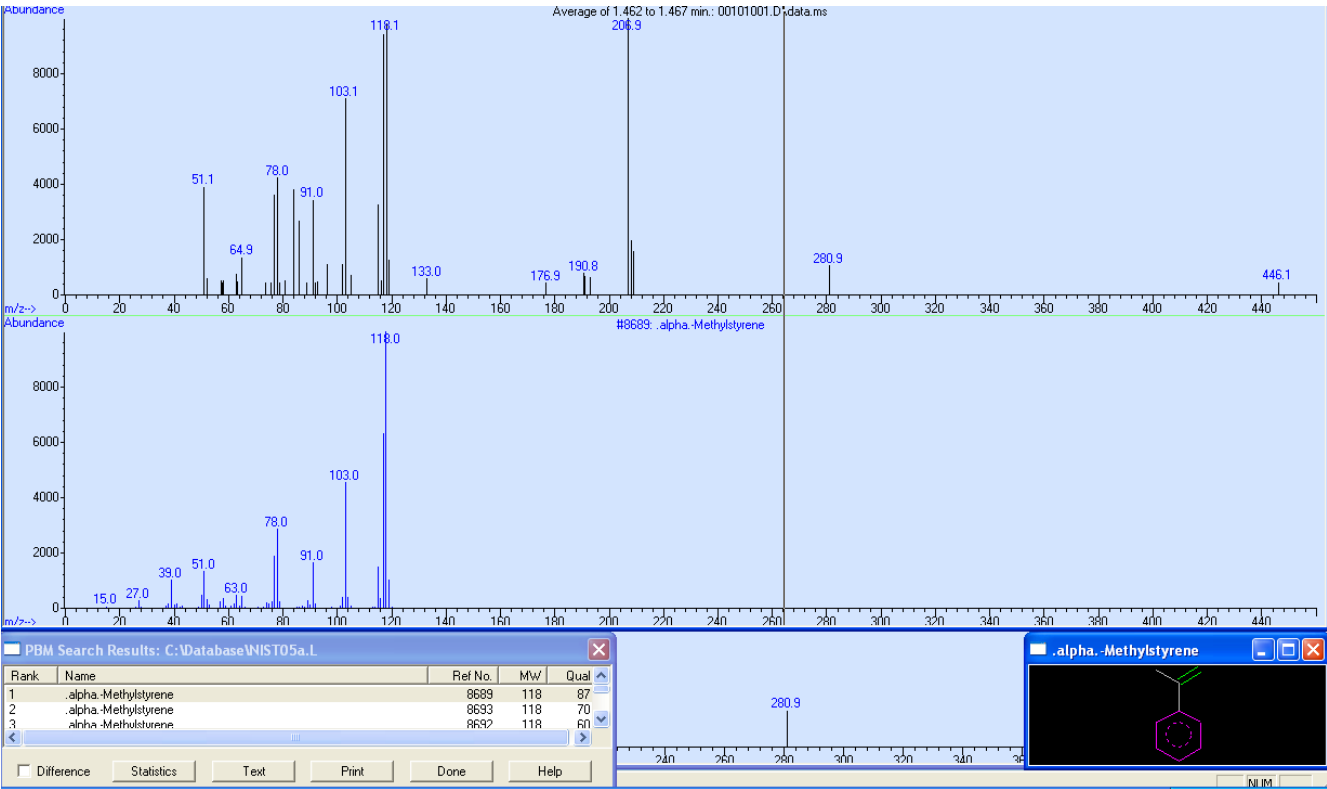

4. Copper-catalyzed C-O coupling reaction of 2,4-dimethyl phenol with 1-bromonaphthalene by CuI/phen/K<sub>2</sub>CO<sub>3</sub>.

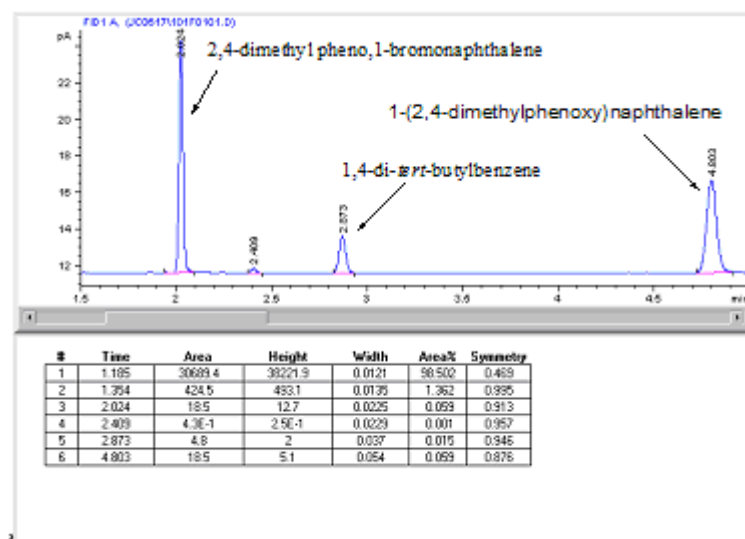

5. Copper-catalyzed C-O coupling reaction of 2,4-dimethyl phenol with 4-chlorobenzonitrile by CuI/phen/K<sub>2</sub>CO<sub>3</sub>.

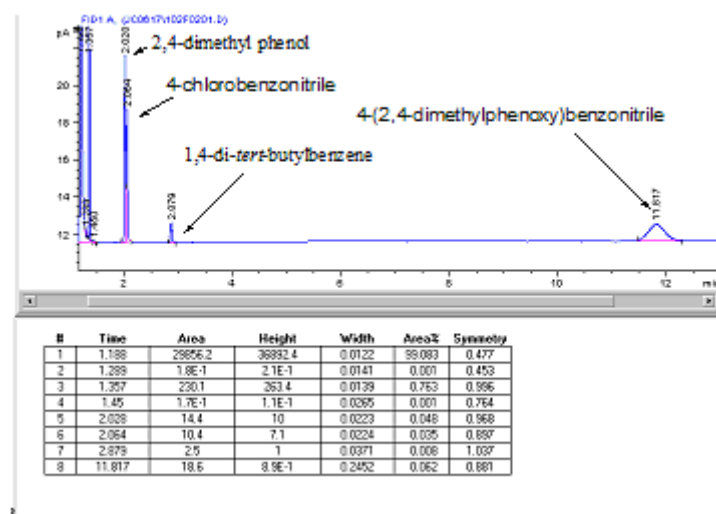

6. Competitive catalytic C-O coupling of 2,4- dimethyl phenol with 4-bromotoluene and 2-bromotoluene by CuI/phen/K<sub>2</sub>CO<sub>3</sub>.

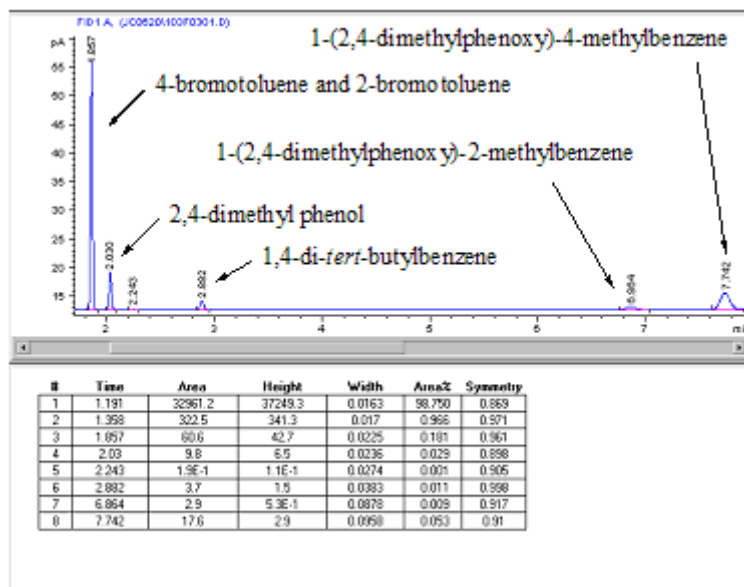

7. Competitive catalytic C-O coupling of 2, 4-dimethyl phenol with 4-bromotoluene and 2-bromotoluene by CuI/K<sub>2</sub>CO<sub>3</sub>.

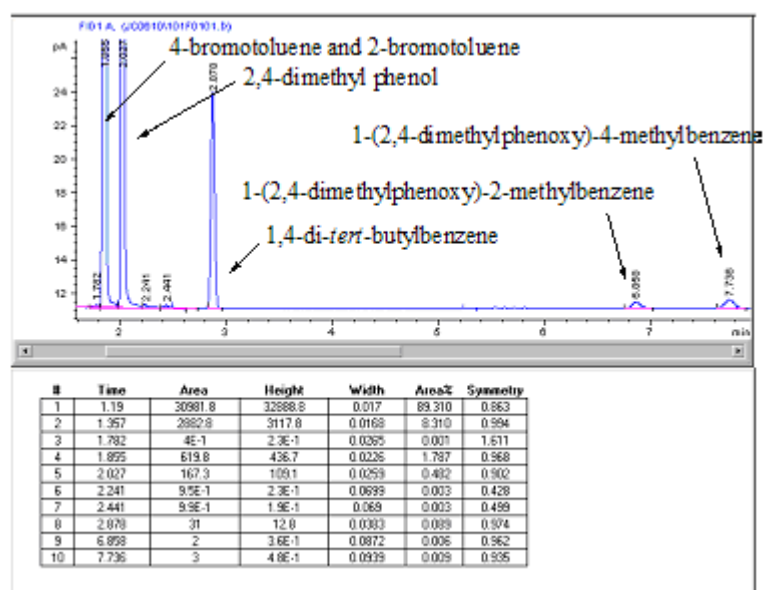

## *In situ* ESI-MS Spectra and Isotope Distributions of Intermediates

1. Experimental and simulated isotopic distributions of  $[\text{Cu}(\text{I})(2,4\text{-dimethylphenoxy})_2]^-$ ,  $\{\text{H}[\text{Cu}(\text{I})(\text{phen})(2,4\text{-dimethylphenoxy})]\}^+$ ,  $[\text{Cu}(\text{I})(\text{phen})(2,4\text{-dimethylphenoxy})(p\text{-tolyl})]^+$ ,  $[\text{Cu}(\text{phen})_2]^+$  and  $\{\text{K}[\text{Cu}(\text{I})(\text{phen})(2,4\text{-dimethylphenoxy})]\}^+$  (from the ESI-MS spectra of the C-O coupling reaction mixture of 2,4-dimethyl phenol and 4-bromotoluene catalyzed by CuI/phen/ $\text{K}_2\text{CO}_3$  in toluene at 120 °C)

ESI-MS(-) full mass

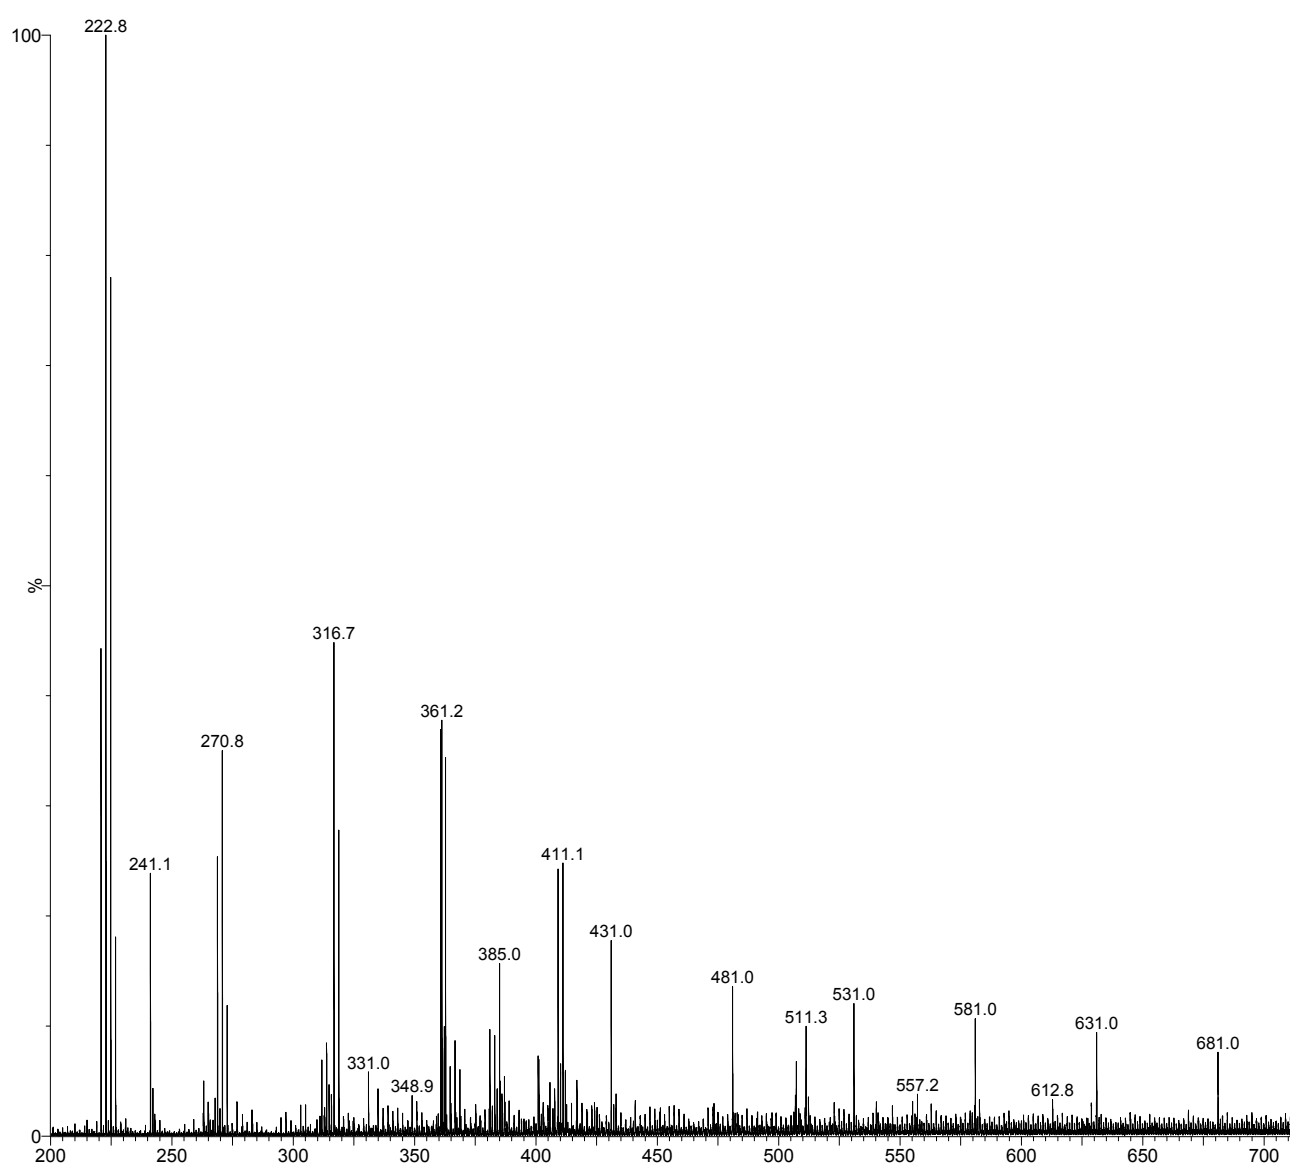



# ESI-MS(+) full mass

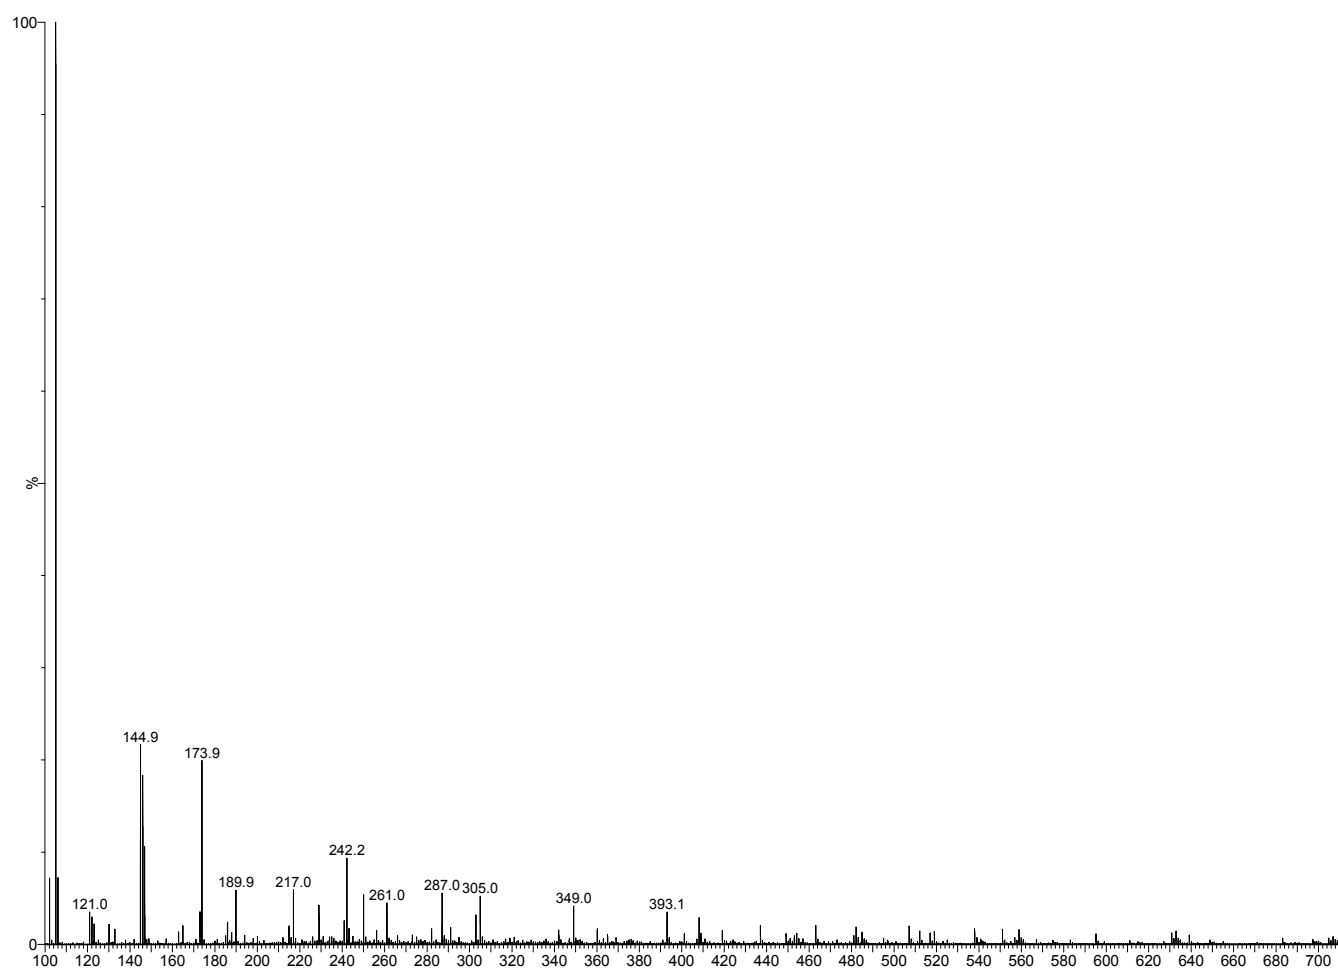

Simulated isotopic distributions of  
[Cu(I)(2,4-dimethylphenoxy)<sub>2</sub>]<sup>-</sup>

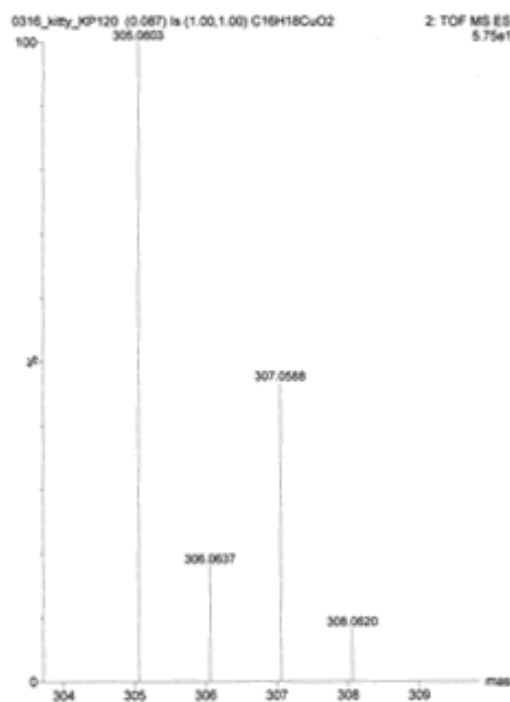

Experimental isotopic distributions of  
[Cu(I)(2,4-dimethylphenoxy)<sub>2</sub>]<sup>-</sup>

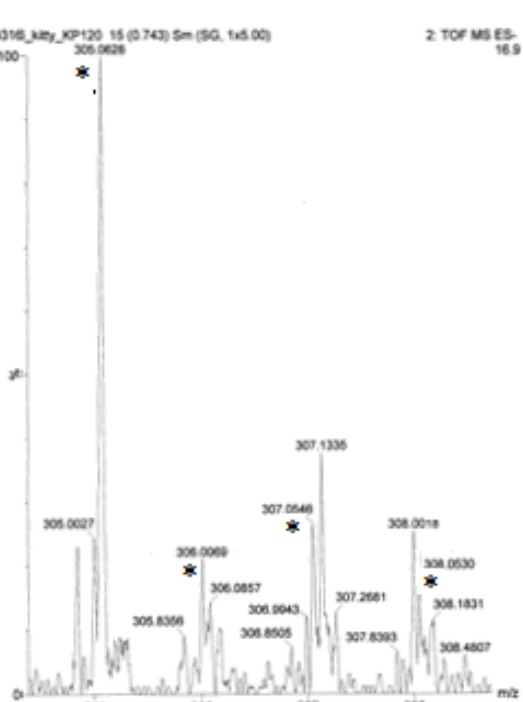

\* Signals of the compound

Simulated isotopic distributions of  
 $\{[Cu(I)(phen)(2,4\text{-dimethylphenoxy})]\}^+$

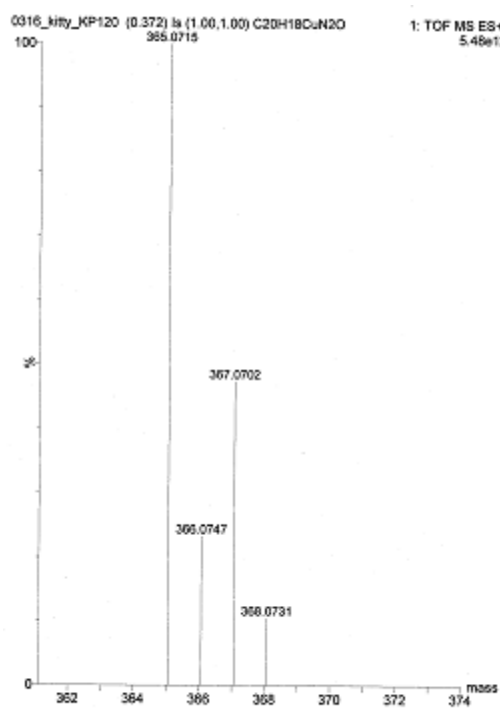

Experimental isotopic distributions of  
 $\{[Cu(I)(phen)(2,4\text{-dimethylphenoxy})]\}^+$

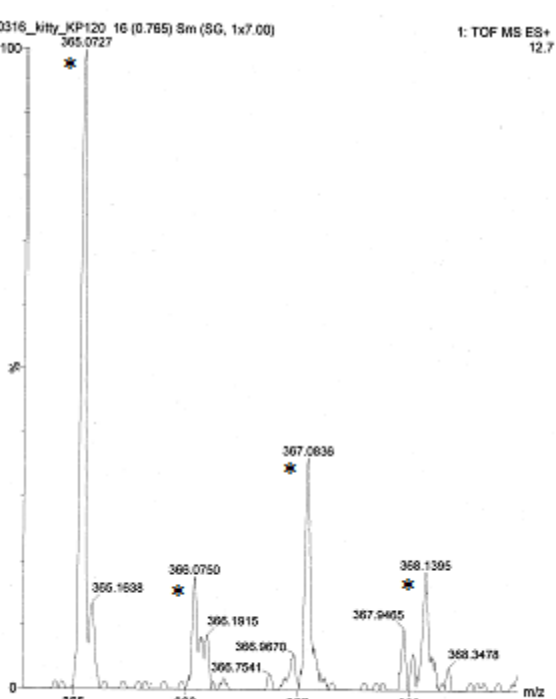

\*Signals of the compound

Simulated isotopic distributions of  
 $[\text{Cu(III)(phen)(2,4-dimethylphenoxy)(p-tolyl)}]^+$  or  
 $[\text{Cu(I)(phen)(1-(2,4-dimethylphenoxy)-4-methylbenzene)}]^+$

Experimental isotopic distributions of  
 $[\text{Cu(III)(phen)(2,4-dimethylphenoxy)(p-tolyl)}]^+$  or  
 $[\text{Cu(I)(phen)(1-(2,4-dimethylphenoxy)-4-methylbenzene)}]^+$

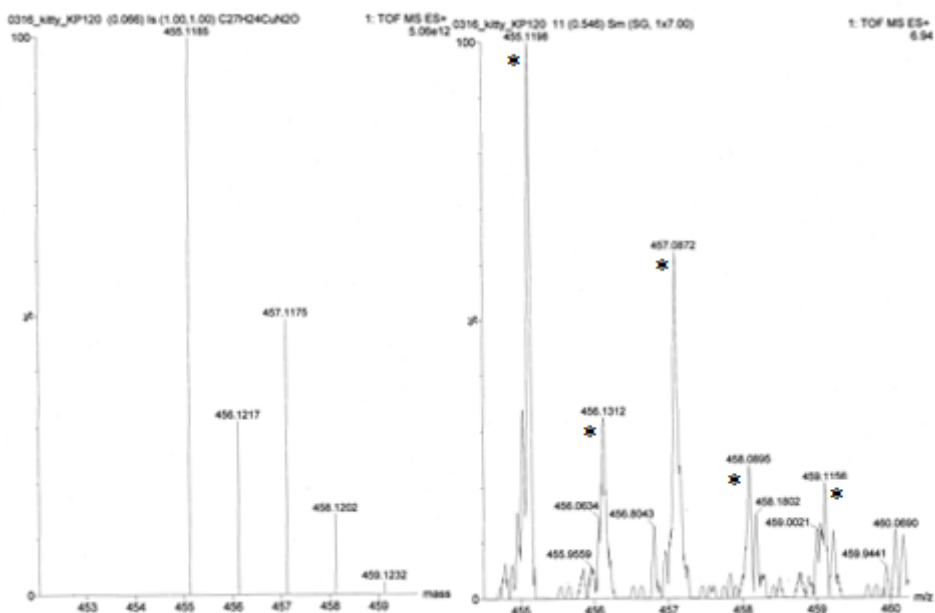

\* Signals of the compound

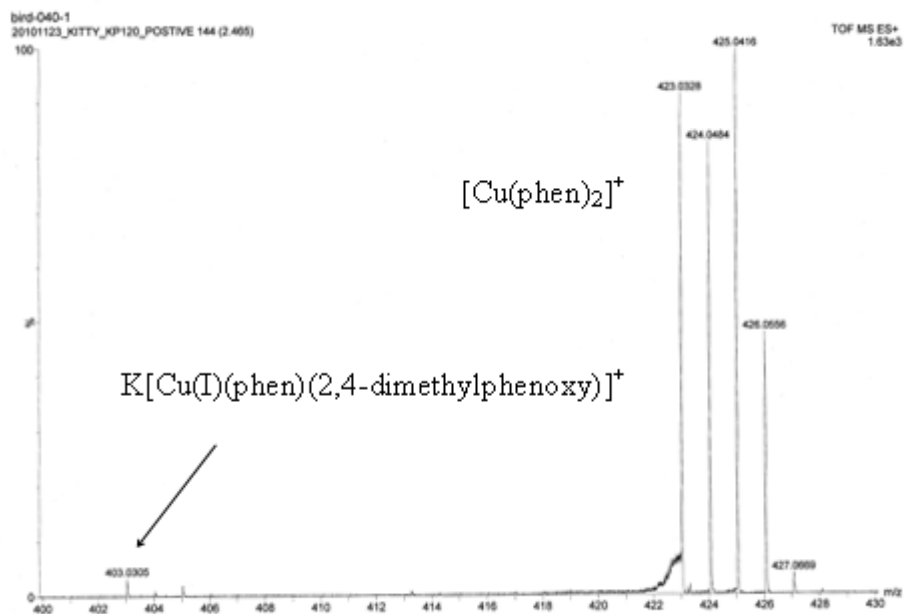

Simulated isotopic distributions of  
 $\{\text{K}[\text{Cu}(\text{I})(\text{phen})(2,4\text{-dimethylphenoxy})]\}^+$

Experimental isotopic distributions of  
 $\{\text{K}[\text{Cu}(\text{I})(\text{phen})(2,4\text{-dimethylphenoxy})]\}^+$

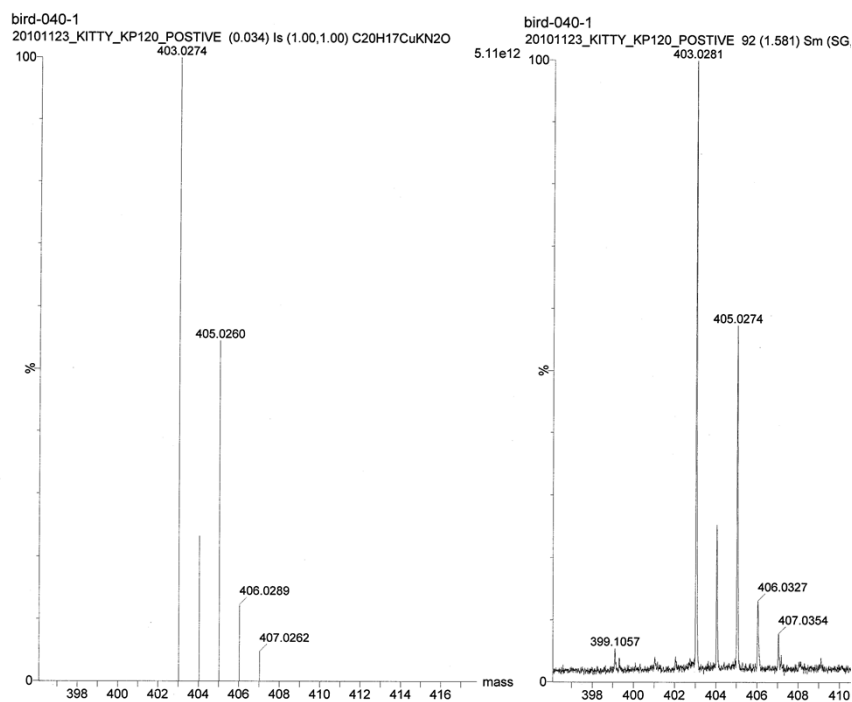

**Simulated isotopic distributions of  
[Cu(I)(phen)<sub>2</sub>]<sup>+</sup>**

**Experimental isotopic distributions of  
[Cu(I)(phen)<sub>2</sub>]<sup>+</sup>**

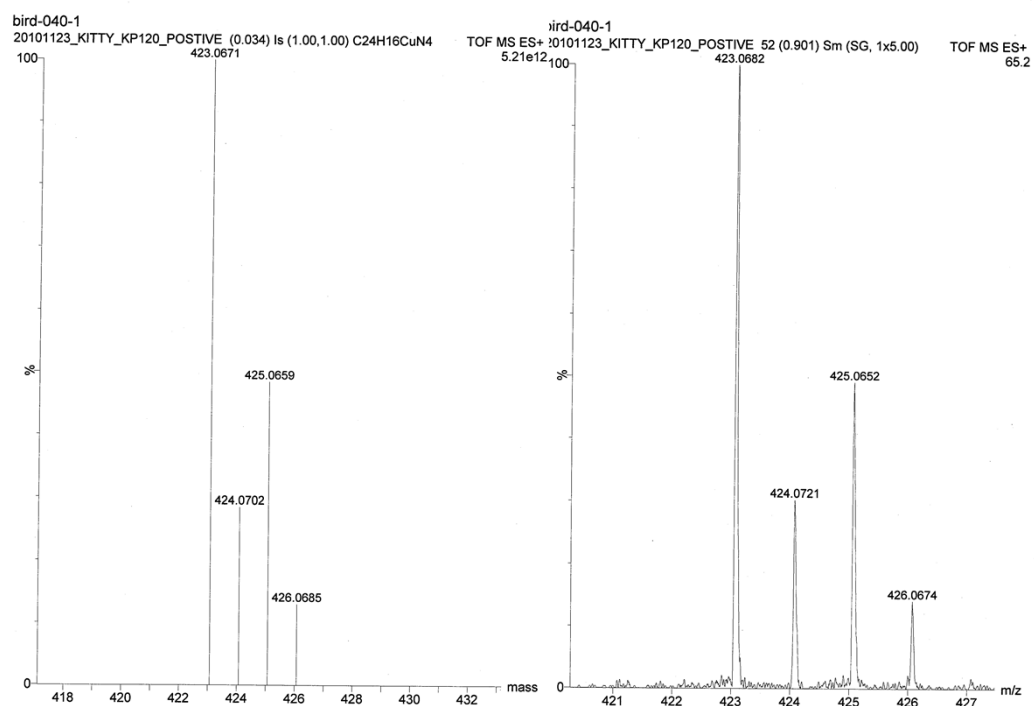

2. Experimental and theoretical isotopic distributions of  $[\text{Cu(I)(2,4-dimethylphenoxy)}_2]^-$  and  $[\text{Cu(I)(2,4-dimethylphenoxy)Br}]^-$ . (from the ESI-MS spectra of the C-O coupling reaction mixture of 2,4-dimethyl phenol and 4-bromotoluene catalyzed by  $\text{CuI/K}_2\text{CO}_3$  in toluene at 120 °C)

ESI-MS(-) full mass

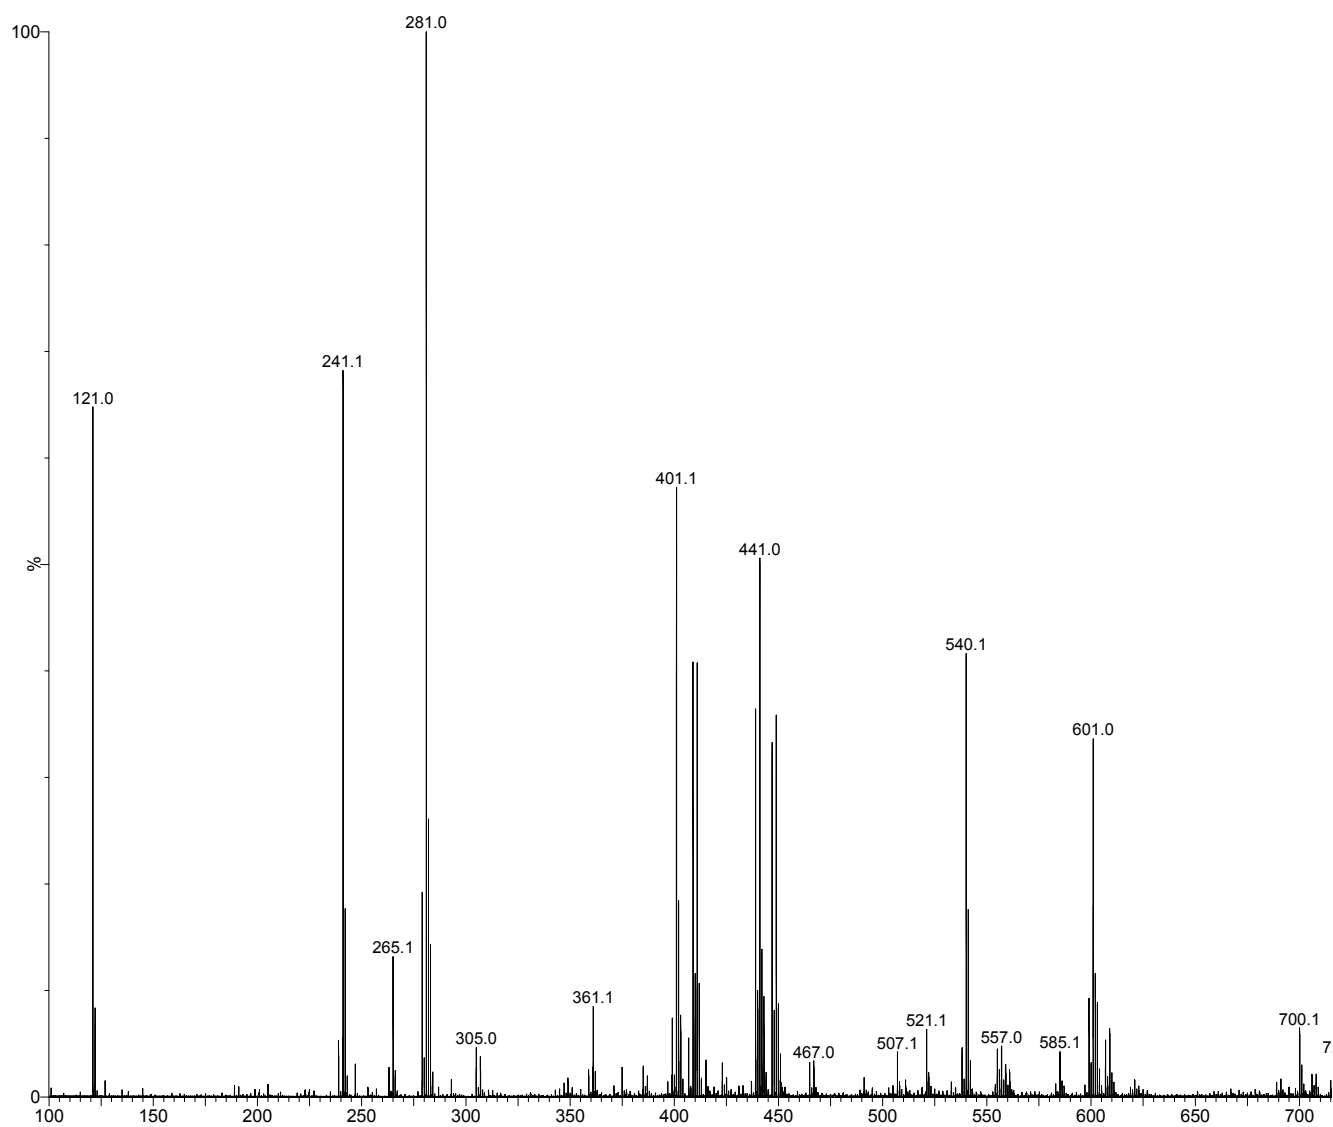

**Simulated isotopic distributions of  
[Cu(I)(2,4-dimethylphenoxy)<sub>2</sub>]<sup>-</sup>**

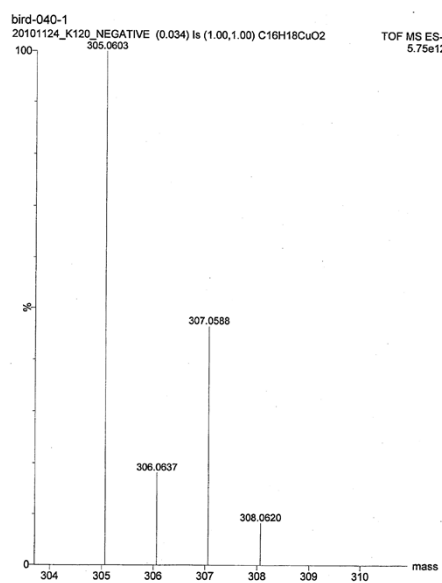

**Experimental isotopic distributions of  
[Cu(I)(2,4-dimethylphenoxy)<sub>2</sub>]<sup>-</sup>**

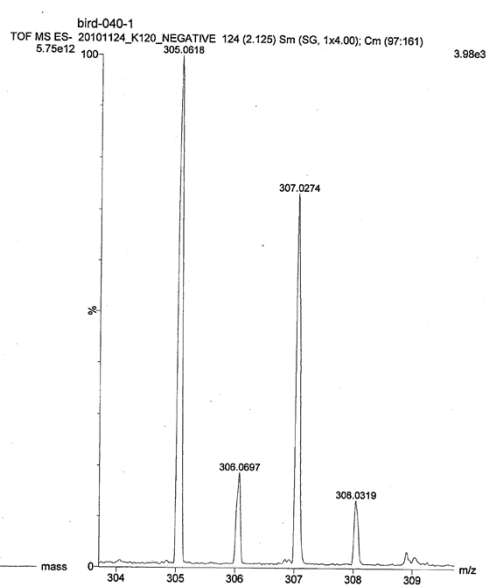



Simulated isotopic distributions of  
[Cu(I)(2,4-dimethylphenoxy)Br]<sup>-</sup>

Experimental isotopic distributions of  
[Cu(I)(2,4-dimethylphenoxy)Br]<sup>-</sup>

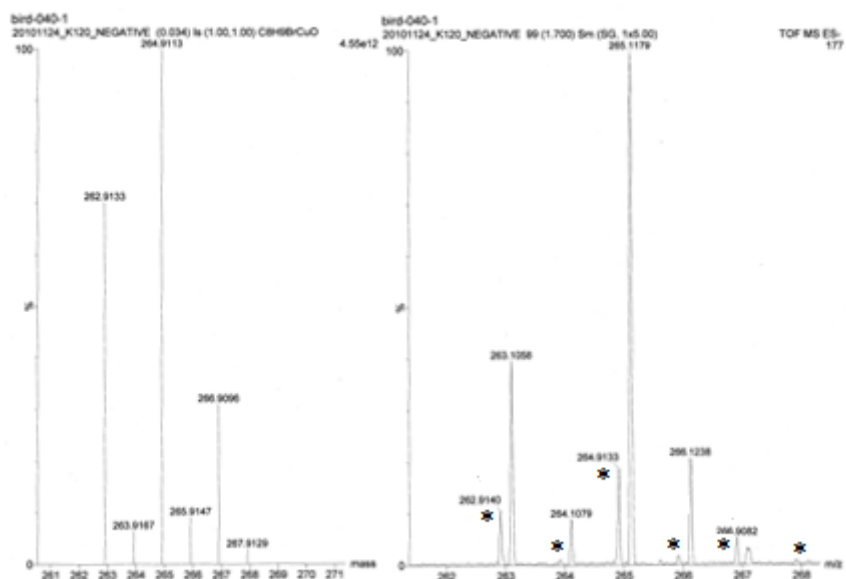

\* Signals of the compound

## EPR spectra for Copper-Catalyzed C-O Cross-Coupling Reaction

Original

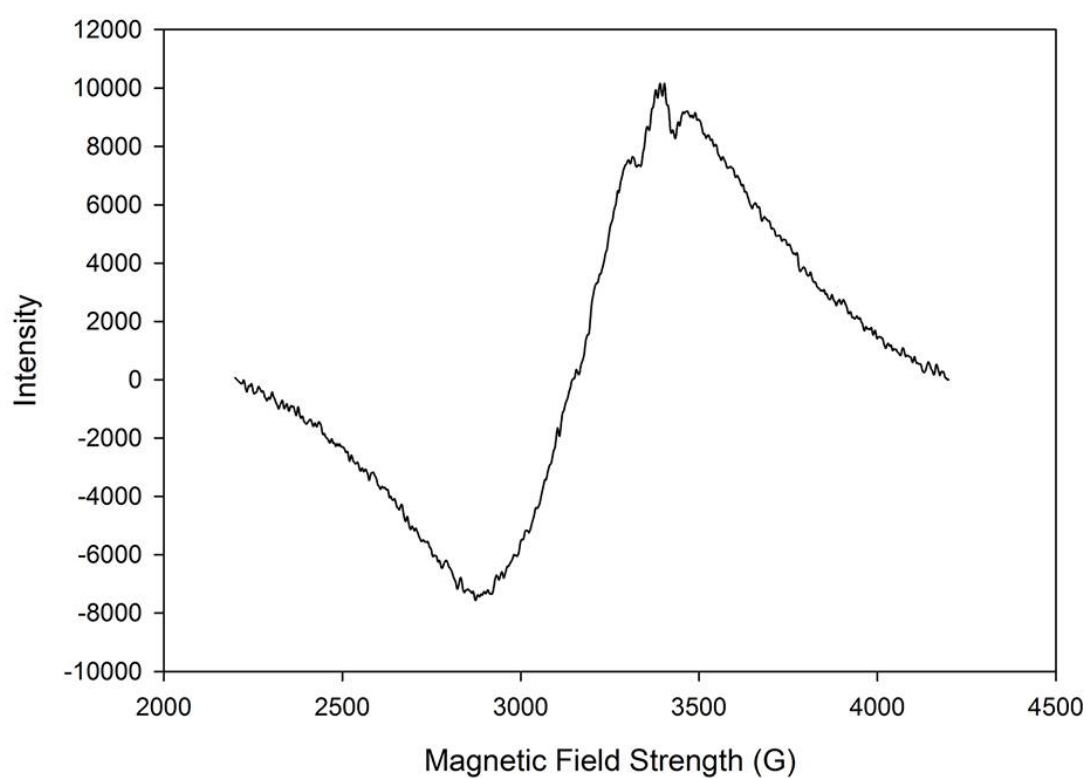

Calibrate

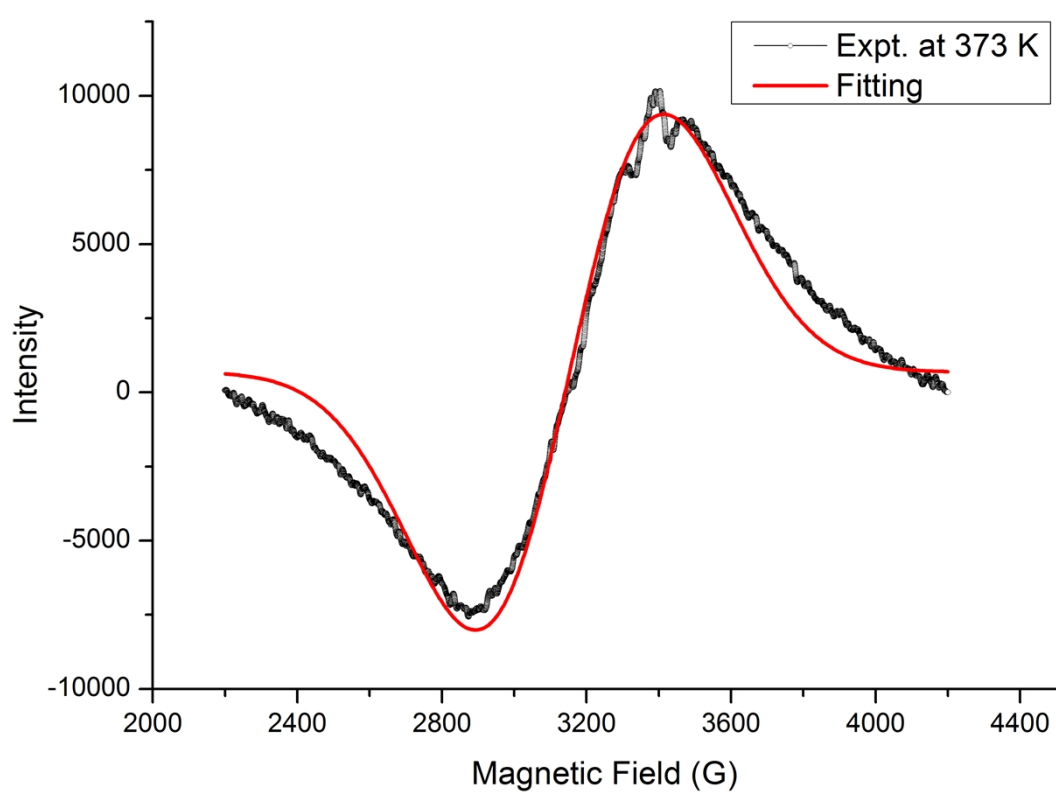

Supplement: c4dt00582a1.pdf [file c4dt00582a1.pdf]
